# Supplementary material
Source: PubMed Central journal article supplement (PMC1664887)
Supplement: jphysiol_2004.060715_1.pdf [file jphysiol_2004.060715_1.pdf]

**Supplement Material**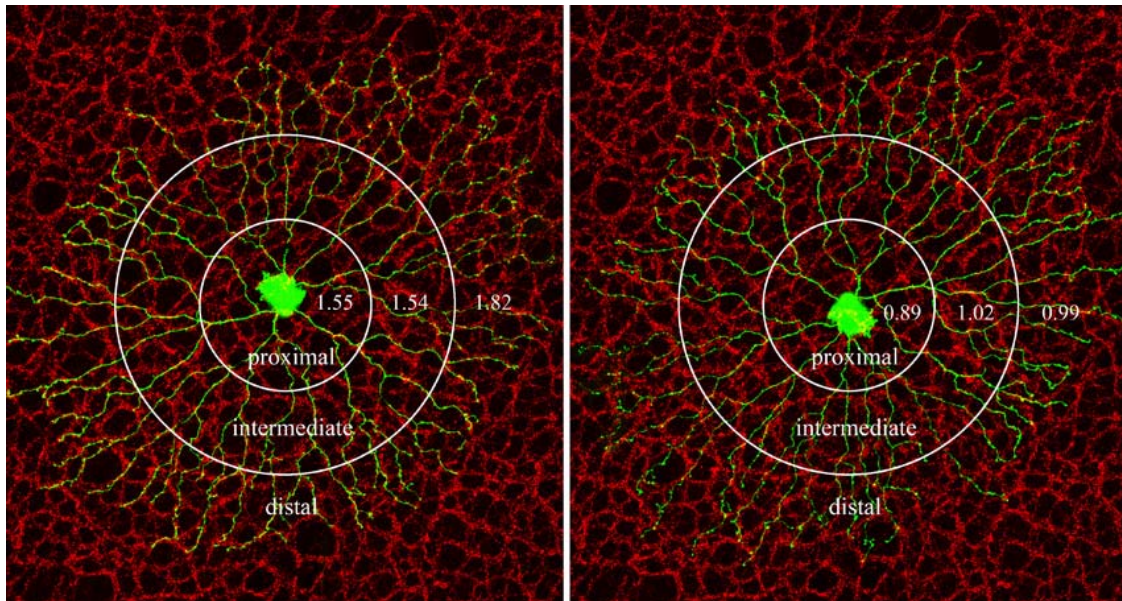

Fig. S1. Two circles were drawn with the inner circle to include as much of the primary dendrites and the outer circle to exclude as much of varicosity-bearing processes. Data analyses were carried out for the central circle and concentric annuli (CIs were noted on corresponding positions). It is apparent that after a  $180^\circ$  rotation (the right panel), the entire cell looks much greener with CIs dropping to near 1.

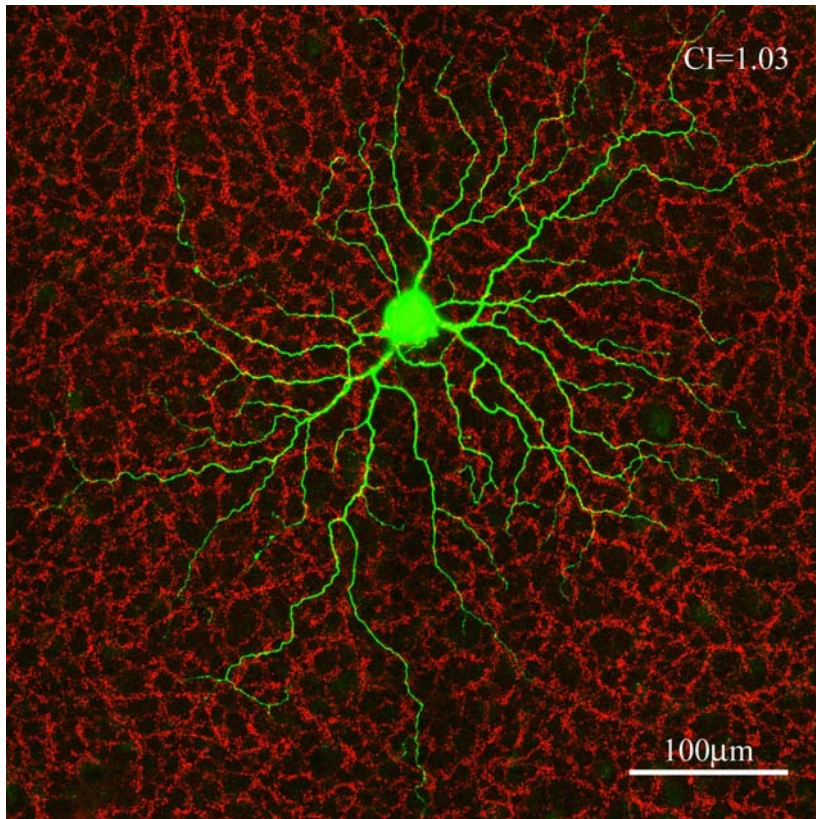

Fig. S2. Non-DS cells do not show dendritic cofasciculation with cholinergic plexus.

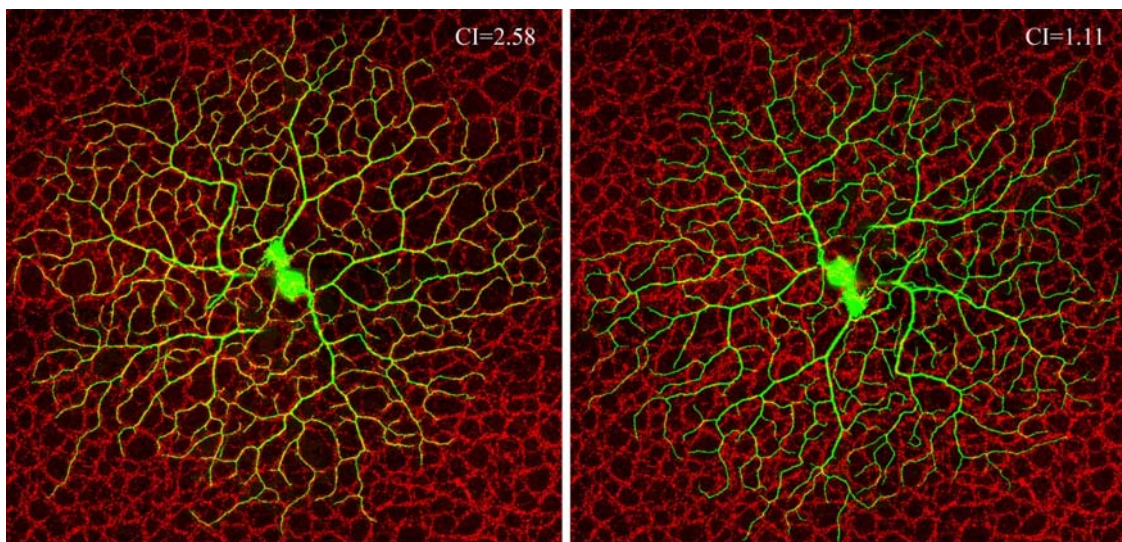

Fig. S3. OFF layer of an ON-OFF DSGC rotated 180° showing much reduced CI.



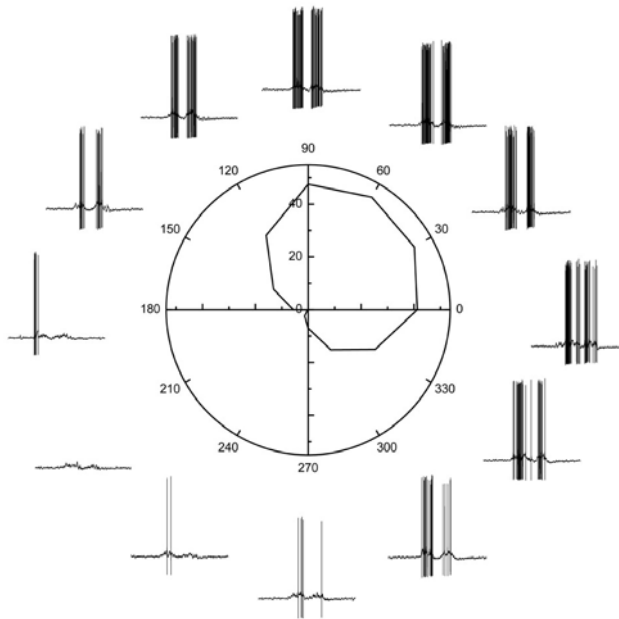

Fig. S4. Electrophysiological recording of an ON-OFF DSGC, showing spike responses to a drifting bar moving in 12 directions. In the center is a polar plot.

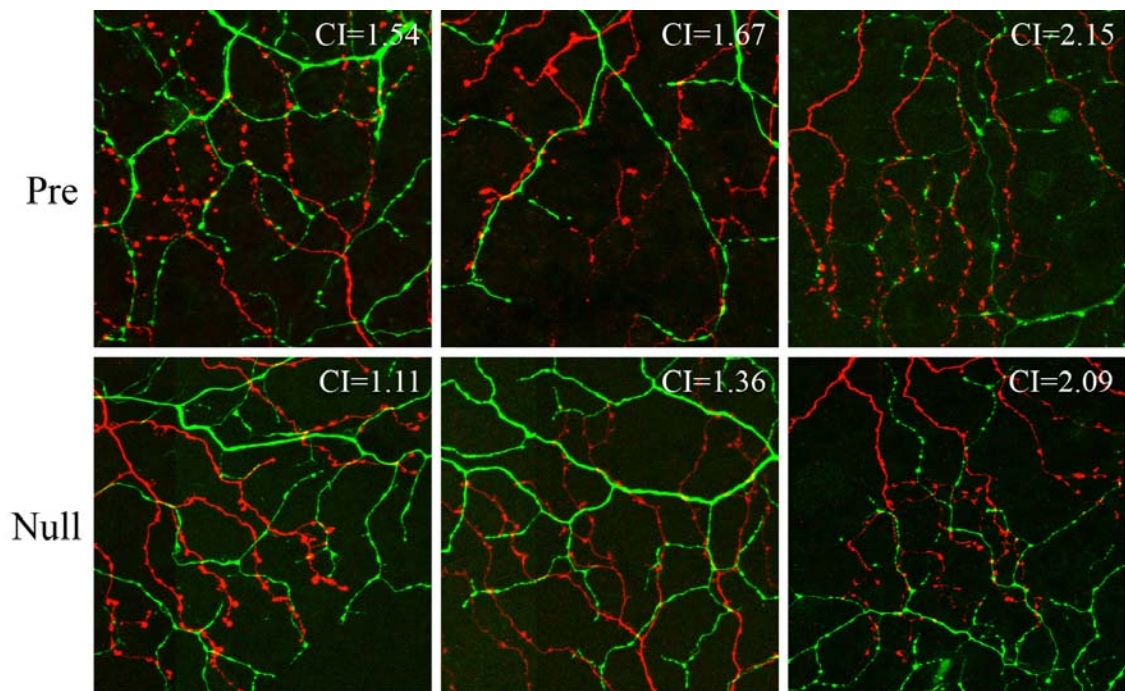

Fig. S5. Variability of cofasciculation. Individual SAs extending into DSGC dendritic field from the preferred and null direction showing different degree of cofasciculation.
